# Supplementary material
Source: HighWire-hosted journal article supplement (https://heart.bmj.com/content/heartjnl-2017-311581)
Supplement: inline-supplementary-material-2 [file inline-supplementary-material-2.pdf]

**Table 10.1.3.1 (cont'd)**  
**Demographic and Baseline Characteristics (Double-Blind Period)**  
**All Patients Randomized Set**

|                                                       | placebo<br>(N=15) | 20 mg<br>(N=22) | 40 mg<br>(N=18) | 80 mg<br>(N=15) | 160 mg<br>(N=13) | total<br>(N=83) |
|-------------------------------------------------------|-------------------|-----------------|-----------------|-----------------|------------------|-----------------|
| <b>Body Mass Index (kg/m<sup>2</sup>)<sup>d</sup></b> |                   |                 |                 |                 |                  |                 |
| mean (SD)                                             | 29                | 34 (10)         | 28 (6)          | 32 (12)         | 27 (5)           | 30 (9)          |
| median (min, max)                                     | 28 (20, 37)       | 30 (20, 60)     | 29 (17, 44)     | 28 (20, 61)     | 26 (19, 38)      | 29 (17, 61)     |
| <b>BMI Categories (kg/ m<sup>2</sup>; N,%)</b>        |                   |                 |                 |                 |                  |                 |
| < 30                                                  | 9 (60)            | 12 (55)         | 13 (72)         | 9 (60)          | 10 (77)          | 53 (64)         |
| ≥ 30                                                  | 6 (40)            | 10 (45)         | 5 (28)          | 6 (40)          | 3 (23)           | 30 (36)         |
| <b>Smoking status (N,%)</b>                           |                   |                 |                 |                 |                  |                 |
| never                                                 | 5 (33)            | 12 (55)         | 8 (44)          | 5 (33)          | 5 (39)           | 35 (42)         |
| current                                               | 7 (47)            | 7 (32)          | 4 (22)          | 4 (27)          | 6 (26)           | 28 (34)         |
| ex                                                    | 3 (20)            | 3 (14)          | 6 (33)          | 6 (40)          | 2 (15)           | 20 (24)         |
| <b>Female Reproductive Status (N,%)</b>               |                   |                 |                 |                 |                  |                 |
| postmenopausal                                        | 1 (7)             | 0               | 0               | 0               | 0                | 1 (1)           |
| surgically sterile                                    | 2 (13)            | 3 (14)          | 0               | 1 (7)           | 0                | 6 (7)           |
| female of childbearing potential                      | 4 (27)            | 7 (32)          | 4 (22)          | 2 (13)          | 4 (31)           | 21 (25)         |
| n/a (male)                                            | 8 (53)            | 12 (55)         | 14 (78)         | 12 (80)         | 9 (69)           | 55 (66)         |

d. BMI is calculated from the weight taken prior to the first dose of study drug and height taken as Screening.
