# Supplementary material
Source: HighWire-hosted journal article supplement (https://heart.bmj.com/content/heartjnl-2017-311581)
Supplement: inline-supplementary-material-3 [file inline-supplementary-material-3.pdf]

## Online appendix Figure 3.

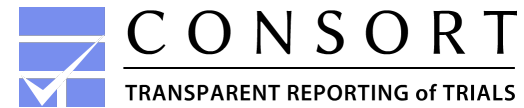

CONSORT 2010 Flow Diagram

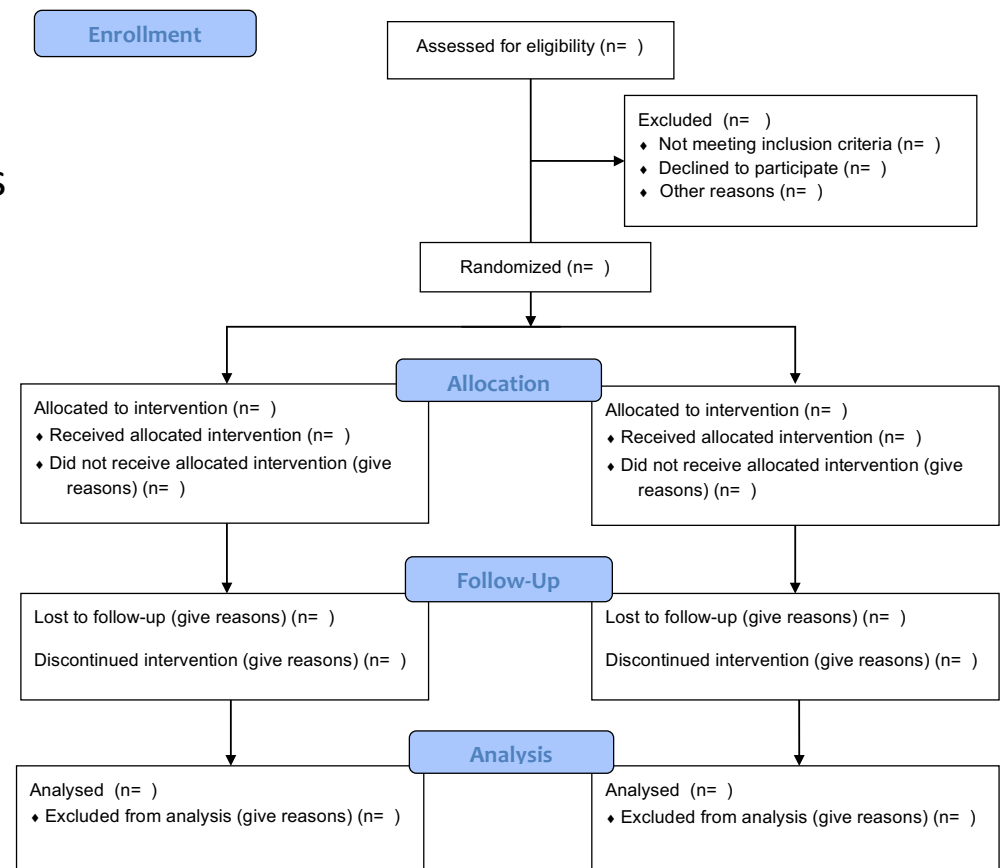

### Remarks:

1. inconsistent handling of potential exclusions (lost to follow up, discontinued, 'excluded from analysis' not as box)
2. redundant repeating text (eg. 'n=', text repeated in both arms)
3. unnecessary blue headers
4. unnecessary bullets
5. counts not aligned
6. boxes of unequal size, incompletely aligned
