# Supplementary material
Source: HighWire-hosted journal article supplement (https://heart.bmj.com/content/heartjnl-2017-311581)

online appendix Figure 5.

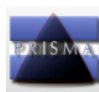

PRISMA 2009 Flow Diagram

Remarks:

1. vertical text
2. blue boxes not aligned to described categories (see red indicator lines), and redundant
3. missing boxes/categories for exclusions: 'duplicates removed'; studies not in quant. analysis
4. unnecessary boxes/categories
5. redundant repeating text (eg. 'records', 'n=')
6. centered text
7. counts centered under text

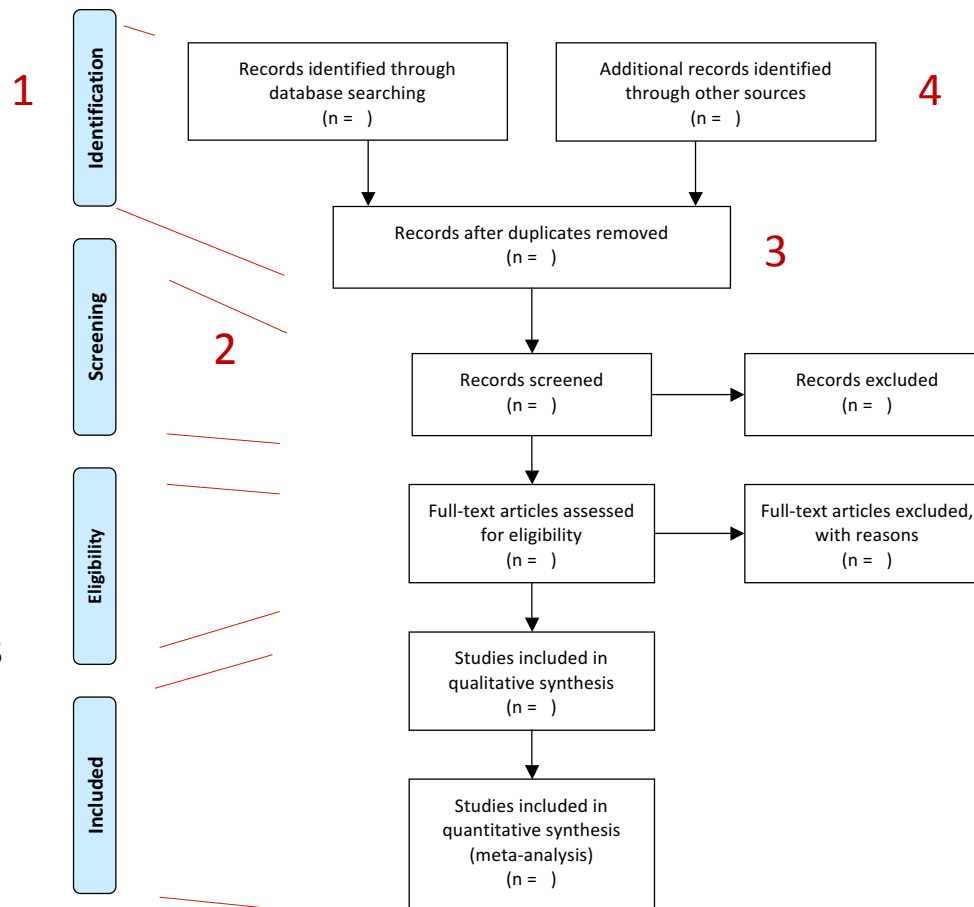

Supplement: inline-supplementary-material-6 [file inline-supplementary-material-6.pdf]
