# Supplementary material
Source: HighWire-hosted journal article supplement (https://heart.bmj.com/content/heartjnl-2017-311581)

### Improved CONSORT 2010 Flow Diagram

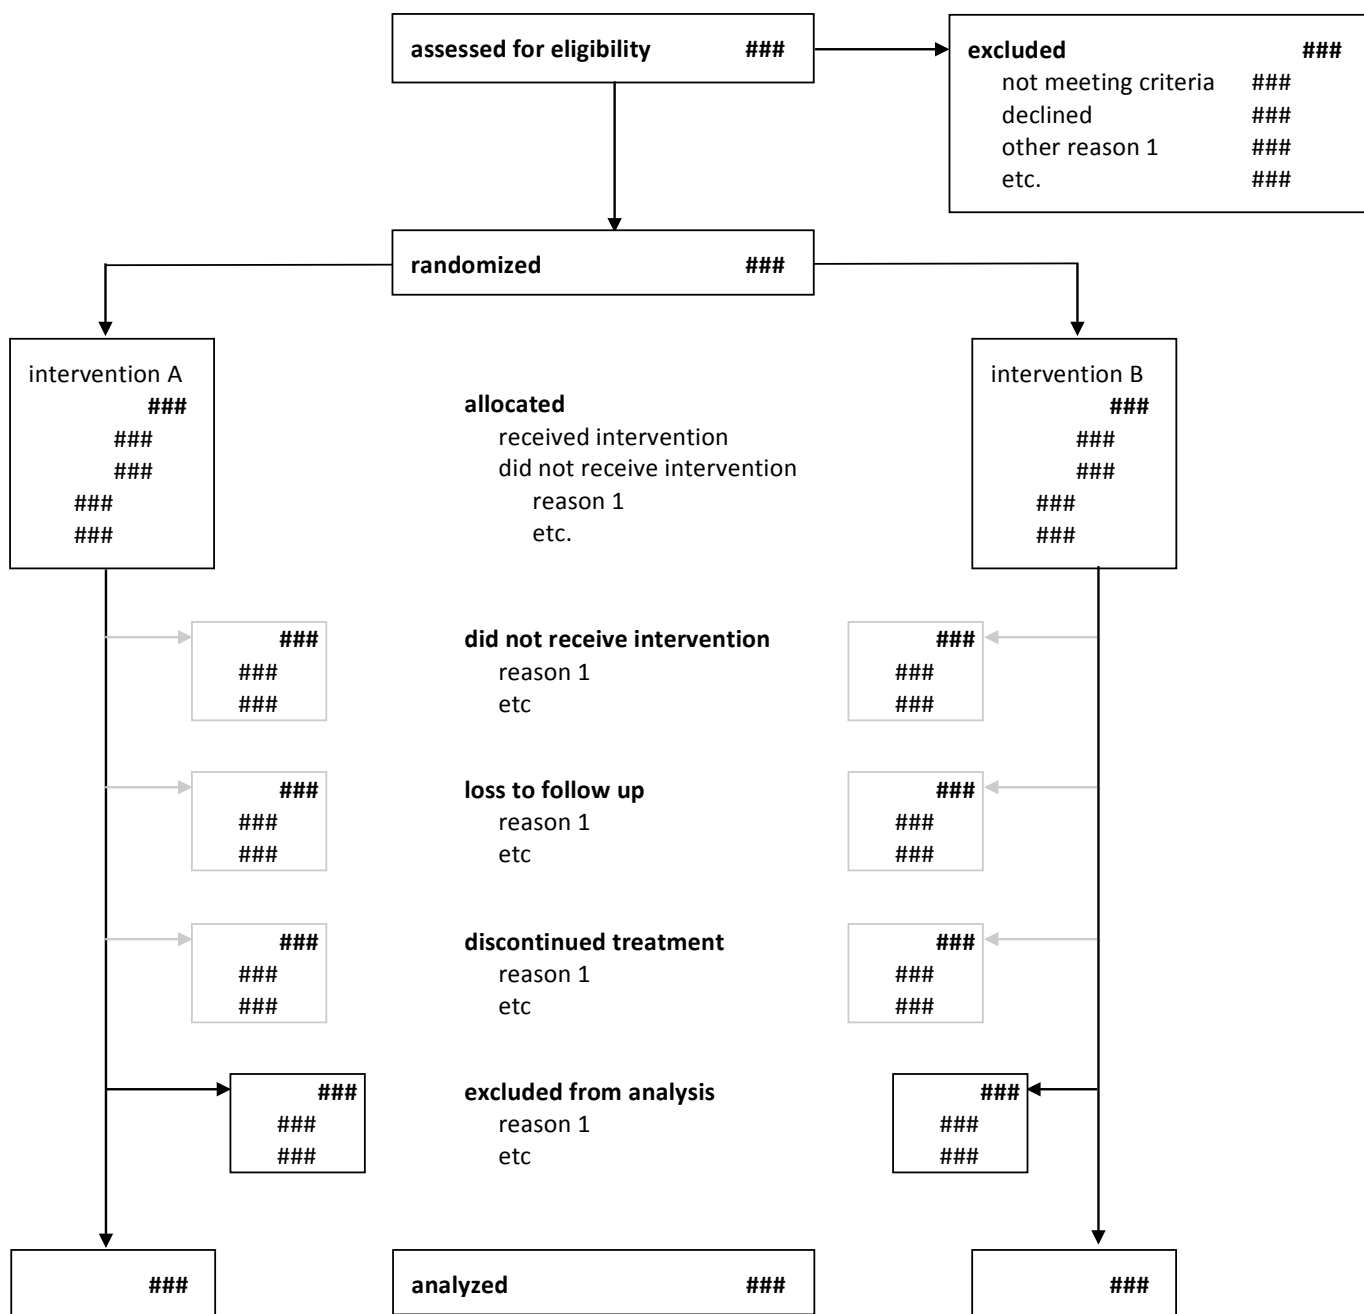

Supplement: inline-supplementary-material-4 [file inline-supplementary-material-4.pdf]

### Improved CONSORT 2010 Flow Diagram

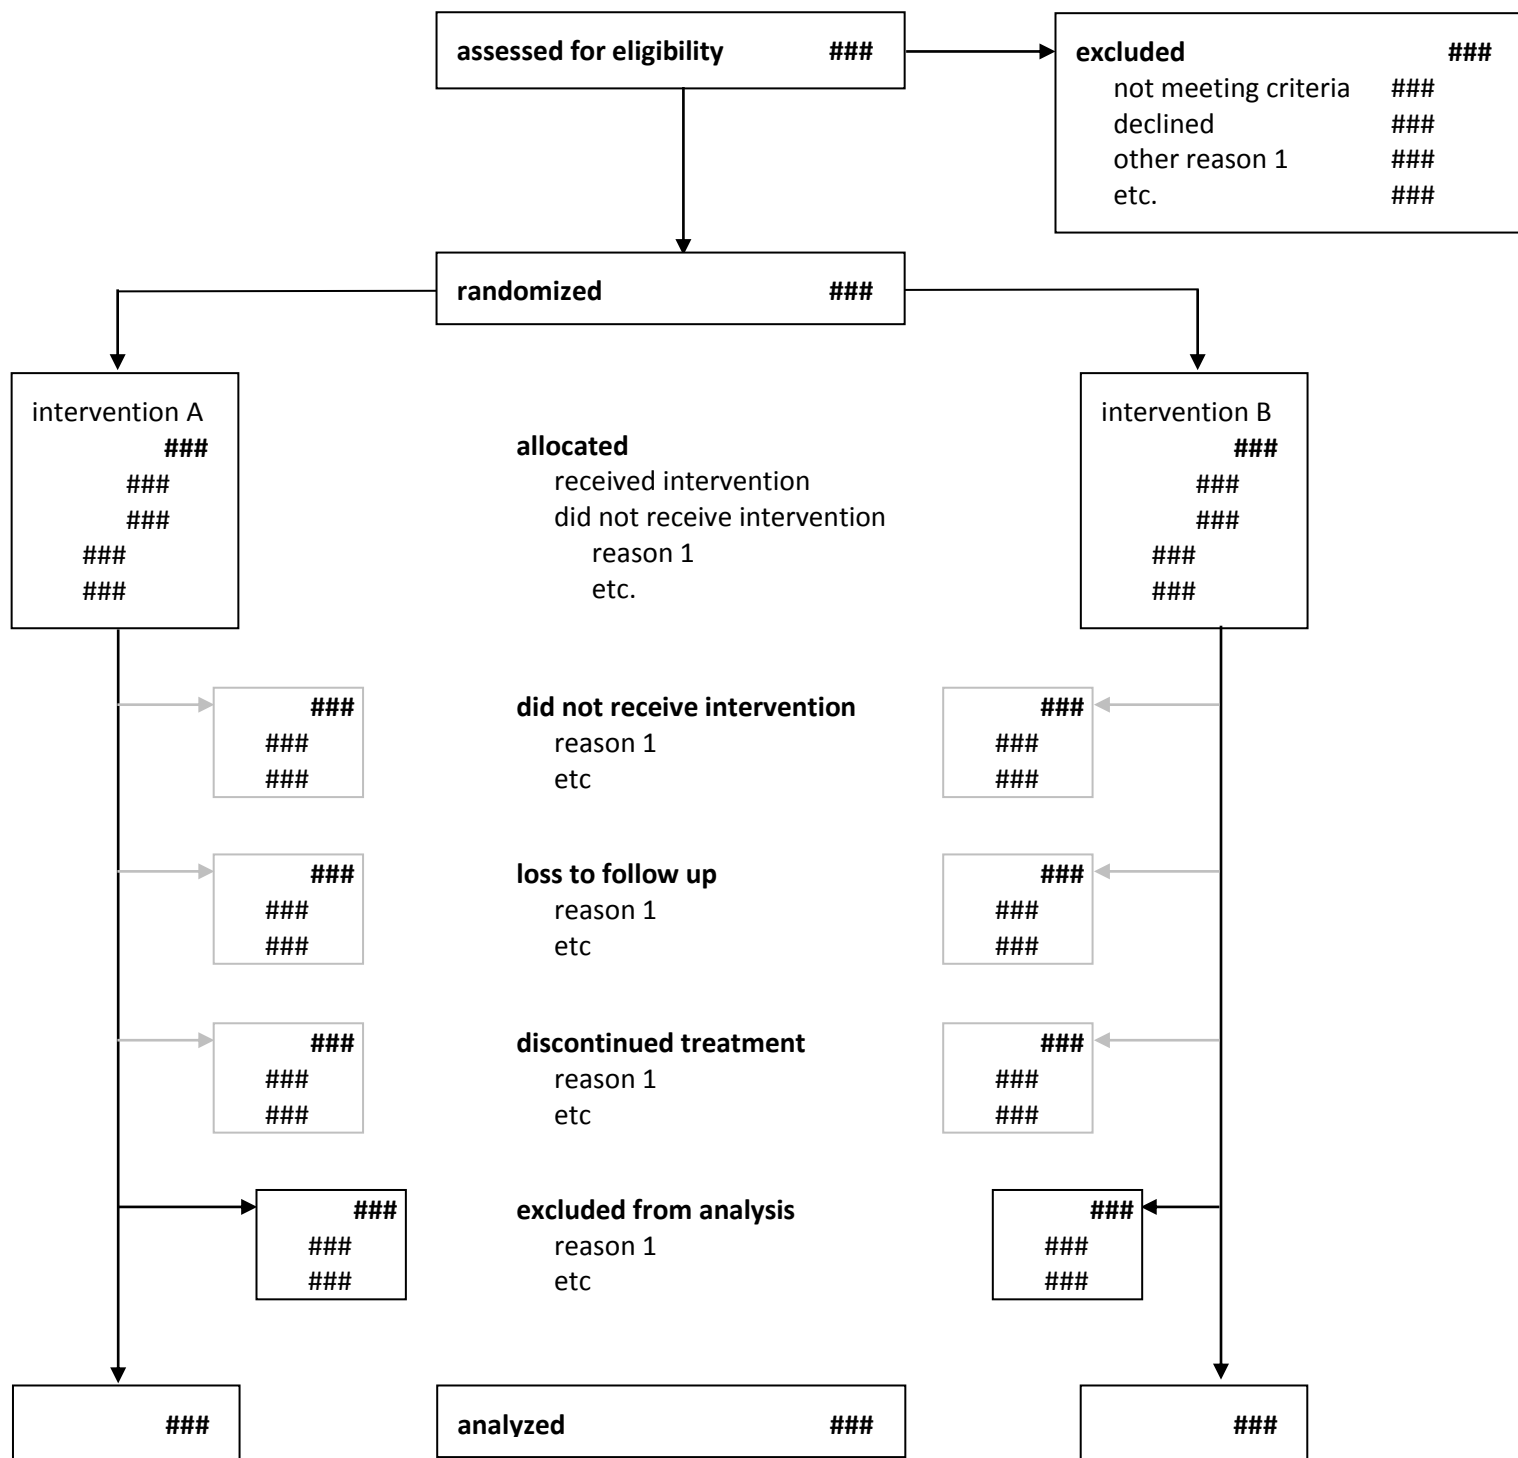

Supplement: inline-supplementary-material-5 [file inline-supplementary-material-5.pdf]

## Improved PRISMA 2009 Flow Diagram

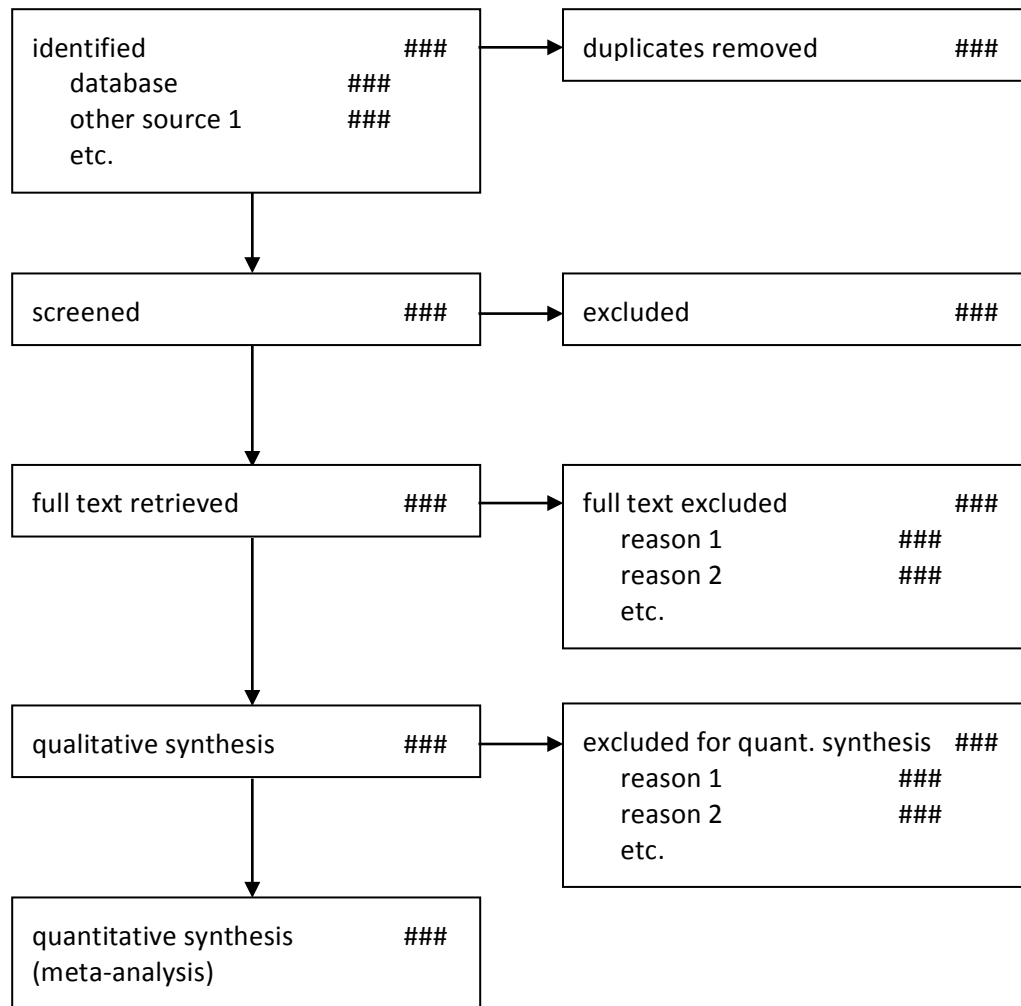

Supplement: inline-supplementary-material-7 [file inline-supplementary-material-7.pdf]

## Improved PRISMA 2009 Flow Diagram

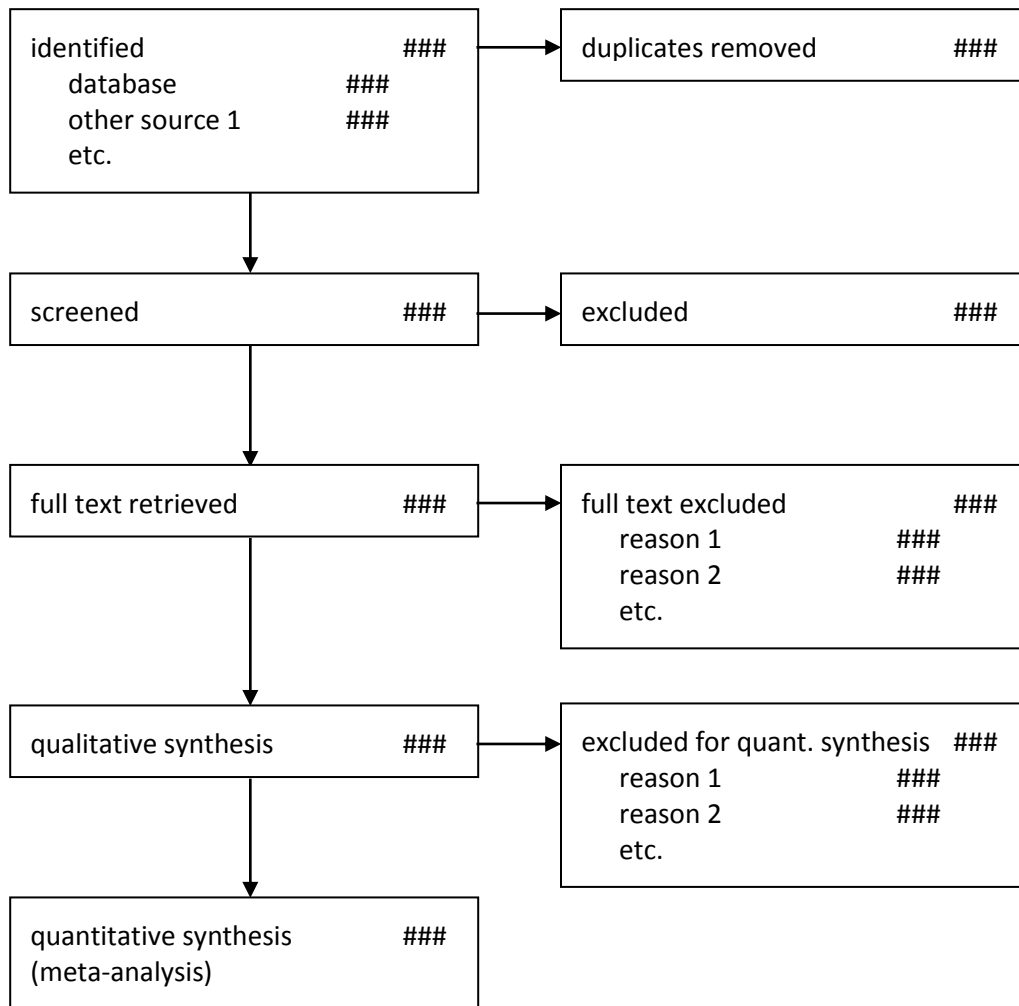

Supplement: inline-supplementary-material-8 [file inline-supplementary-material-8.pdf]
